# Supplementary material for: Molecular characterization and analysis of high-level multidrug-resistance of Shigella flexneri serotype 4s strains from China
Source: PubMed Central journal article supplement (PMC4931504; doi:10.1038/srep29124), 2016-07-04
Supplement: srep29124-s2.pdf [file srep29124-s2.pdf]

## Molecular characterization and analysis of high-level multidrug-resistance of *Shigella flexneri* serotype 4s strains from China

Chaojie Yang, Peng Li, Xiujuan Zhang, Qiuxia Ma, Xianyan Cui, Hao Li, Hongbo Liu, Jian Wang, Jing Xie, Fuli Wu, Chunyu Sheng, Xinying Du, Lihua Qi, Wenli Su, Leili Jia, Xuebin Xu, Jiayong Zhao, Shengli Xia, Na Zhou, Hui Ma, Shaofu Qiu\* and Hongbin Song\*

### Supplementary Text S1.

**New DNA sequences and new allele combination of MLST result in this research.**

#### New DNA Sequences:

Allele Name: rpoS

Isolate GX4s03:

```
ATTGCCCGCCGTTATGGCAATCGTGGTCTGGCGTTGCTGGGCCTTATCGAAGAGGGCAACTT
GGGGCTGATCCGCGCGGTAGAGAAGTTTGACCCGGAACGTGGTTTCCGCTTCTCAACATACG
CAACCTGGTGGATTCGCCAGACGATTGAACGGGCGATTATGAACCAAACCCGTAATTCGT
TTGCCGATTCACATCGTAAAGGAGCTGAACGTTTACCTGCGAACCGCACGTGAGTTGTCCCA
TAAAGCTGGACCATGAACCAAGTGC GGAAGAGATCGCAGAGCAACTGGATAAGCCAGTTGATG
ACGTCAGCCGTATGCTTCGTCTTAACGAGCGCATTACCTCGGTAGACACCCCGCTGGGTGGT
GATTCGAAAAAGCGTTGCTGGACATCCTGGCCGATGAAAAAGAGAACGGTCCGGAAGATAC
CACGCAAGATGACGATATGAAGCAGAGCATCGTCAAATGGCTGTTTCGAGCTGAACGCCAAAC
AGCGTGAAGTACTGGCACGTCGATTCGGTT
```

Isolate GX4s01:

```
ATTGCCCGCCGTTATGGCAATCGTGGTCTGGCGTTGCTGGACCTTATCGAAGAGGGCAACTT
GGGGCTGATCCGCGCGGTAGAGAAGTTTGACCCGGAACGTGGTTTCCGCTTCTCAACATACG
CAACCTGGTGGATTCGCCAGACGATTGAACGGGCGATTATGAACCAAACCCGTAATTCGT
TTGCCGATTCACATCGTAAAGGAGCTGAACGTTTACCTGCGAACCGCACGTGAGTTGTCCCA
TAAACACGTGAGTTGTCCATAAGCTGGACCATGAACCAAGTGC GGAAGAGATCGCAGAGCAA
CTGGATAAGCCAGTTGATGACGTCAGCCGTATGCTTCGTCTTAACGAGCGCATTACCTCGGT
AGACACCCCGCTGGGTGGTATTCCGAAAAAGCGTTGCTGGACATCCTGGCCGATGAAAAAG
AGAACGGTCCGGAAGATACCACGCAAGATGACGATATGAAGCAGAGCATCGTCAAATGGCTG
TTCGAGCTGAACGCCAAACAGCGTGAAGTACTGGCACGTCGATTCGGTT
```

#### New allele combination:

Isolate SH4s05:

| Allele Name | arcA | aroE | aspC | clpX | cyaA | dnaG | fadD | grpE | icdA | lysP | mdh | mtlD | mutS | rpoS | uidA |
|-------------|------|------|------|------|------|------|------|------|------|------|-----|------|------|------|------|
| Number      | 8    | 10   | 13   | 16   | 10   | 11   | 14   | 10   | 16   | 23   | 19  | 15   | 14   | 64   | 14   |
